# Supplementary material
Source: PubMed Central journal article supplement (PMC11113364)
Supplement: 18_2014_1652_MOESM1_ESM.pdf [file 18_2014_1652_MOESM1_ESM.pdf]

**Title:**

Computationally Driven Deletion of Broadly Distributed T cell Epitopes in a Biotherapeutic Candidate

**Authors:**

Regina S. Salvat<sup>1</sup>, Andrew S. Parker<sup>2†</sup>, Andrew Guilliams<sup>1\*</sup>, Yoonjoo Choi<sup>2</sup>, Chris Bailey-Kellogg<sup>2,4</sup>, Karl E. Griswold<sup>1,3,4</sup>

**Affiliations**

<sup>1</sup> Thayer School of Engineering, Dartmouth, Hanover, NH

<sup>2</sup> Department of Computer Science, Dartmouth, Hanover, NH

<sup>3</sup> Program in Molecular and Cellular Biology, Dartmouth, Hanover, NH

<sup>4</sup> Correspondence should be addressed to:

K.E.G. (karl.e.griswold@dartmouth.edu)

Thayer School of Engineering

Dartmouth

14 Engineering Dr.

Hanover, NH 03755

Ph: 603-676-3044

C.B.K. (cbk@cs.dartmouth.edu)

Department of Computer Science

Dartmouth

9 Maynard St.

Hanover, NH 03755

Ph: 603-646-3385

† Current Address: Zettics, 150 Baker Ave. Ext., Ste. 201, Concord, MA

\* Current Address: Mascoma Corp. 67 Old Etna Road #300, Lebanon, NH

**Short Title**

Optimized Epitope Deletion

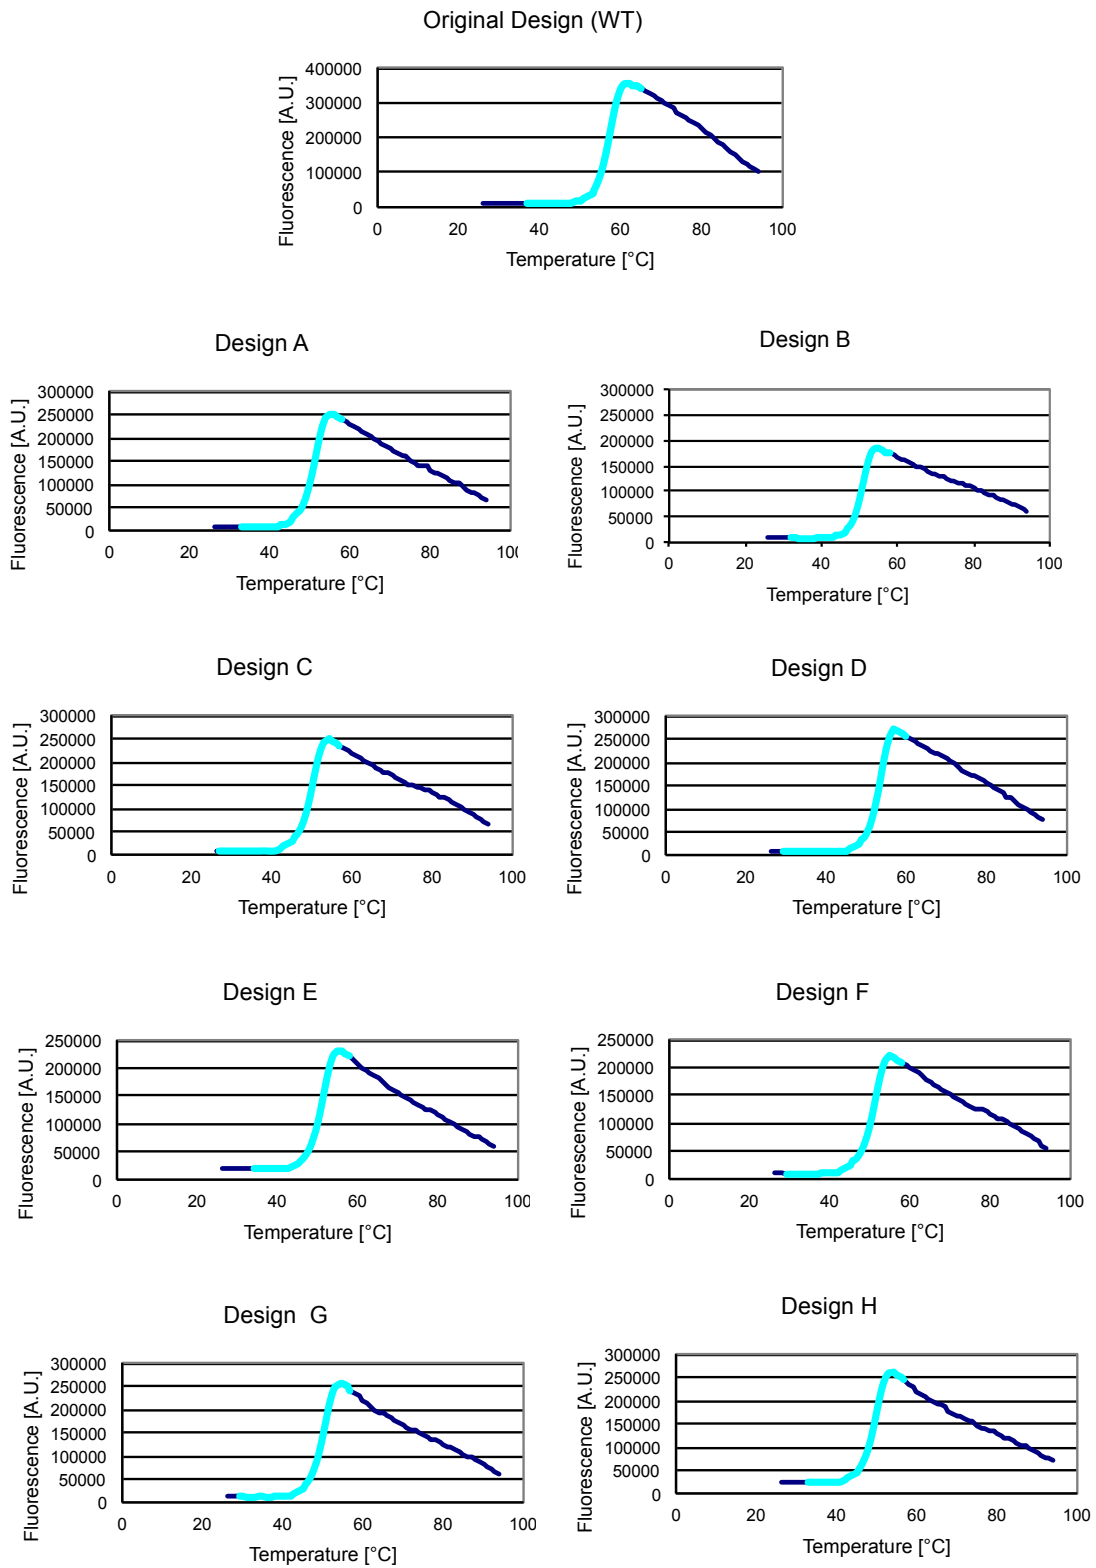

Figure S1 – Differential scanning fluorimetry melting curves for variant enzymes. Protein unfolding is characterized by an increase in fluorescence.

Table S1. ProPred Binding Predictions and Measured Peptide-MHC II IC<sub>50</sub> Values

| Peptide | # Predicted Epitopes <sup>a</sup> |      |      |      | Experimental IC <sub>50</sub> <sup>b</sup> |        |        |        |
|---------|-----------------------------------|------|------|------|--------------------------------------------|--------|--------|--------|
|         | Allele DRB1*                      |      |      |      | Allele DRB1*                               |        |        |        |
|         | 0101                              | 0401 | 0701 | 1501 | 0101                                       | 0401   | 0701   | 1501   |
| A13     | 1                                 | 2    | 2    | 1    | >250                                       | 22.94  | 0.8185 | 12.1   |
| A13D    | 0                                 | 0    | 0    | 0    | >250                                       | >250   | 56.13  | 61.25  |
| A13E    | 0                                 | 1    | 0    | 0    | >250                                       | 71.12  | 74.46  | >250   |
| K21     | 0                                 | 1    | 0    | 0    | 3.58                                       | 3.623  | 41.49  | 5.378  |
| K21E    | 0                                 | 0    | 0    | 0    | 16.7                                       | 11.37  | 40.43  | 16.79  |
| R105    | 2                                 | 2    | 1    | 2    | >250                                       | >250   | 20.64  | 12.27  |
| R105S   | 1                                 | 1    | 1    | 1    | 26.73                                      | >250   | >250   | 69.45  |
| R133    | 0                                 | 0    | 0    | 1    | 161.6                                      | >250   | 72.85  | 0.133  |
| R133H   | 0                                 | 0    | 0    | 1    | 27.09                                      | >250   | 35.11  | 0.1752 |
| R210    | 0                                 | 0    | 1    | 2    | >250                                       | >250   | >250   | 21.18  |
| R210H   | 0                                 | 0    | 0    | 0    | >250                                       | >250   | >250   | 91.5   |
| M235    | 2                                 | 1    | 0    | 0    | 12.41                                      | 23.64  | 16.95  | >250   |
| M235D   | 0                                 | 0    | 0    | 0    | >250                                       | >250   | 28.02  | >250   |
| M235Q   | 0                                 | 0    | 0    | 0    | 12.12                                      | 37.46  | 23.1   | >250   |
| I262    | 1                                 | 1    | 2    | 1    | 22.17                                      | 0.4567 | 1.675  | 0.3233 |
| I262T   | 0                                 | 1    | 1    | 0    | >250                                       | 2.185  | 4.147  | 5.725  |

<sup>a</sup> For each allele, values indicate the number of predicted epitopes within a synthetic peptide. Positive correlations between predicted and measured peptide binding are shaded (experimental binding threshold set at 100  $\mu$ M).

<sup>b</sup> IC<sub>50</sub> values less than 1  $\mu$ M are considered strong binders (black), 1  $\mu$ M  $\leq$  IC<sub>50</sub> < 10  $\mu$ M moderate binders (dark grey), 10  $\mu$ M  $\leq$  IC<sub>50</sub> < 100  $\mu$ M weak binders (light grey), and IC<sub>50</sub>  $\geq$  100  $\mu$ M are classified as non-binders (no shading).
